# Supplementary material
Source: MDPI journal article supplement (https://www.mdpi.com/1424-2818/15/3/352)
Supplement: s1 [file s1]

## Article

# Fragmentation level drives local fish assemblage diversity patterns in fragmented river basins

Gustavo Díaz <sup>1,2,\*</sup>, Konrad Górski <sup>3,4</sup>, Aliro Manosalva <sup>1,2</sup>, Bárbara Toledo <sup>1,2</sup> & Evelyn Habit <sup>1,2</sup>

<sup>1</sup> Departamento de Sistemas Acuáticos, Facultad de Ciencias Ambientales, Universidad de Concepción, Concepción, Chile

<sup>2</sup> Centro de Ciencias Ambientales EULA-Chile, Universidad de Concepción, Concepción, Chile

<sup>3</sup> Instituto de Ciencias Marinas y Limnológicas, Facultad de Ciencias, Universidad Austral de Chile, Valdivia, Chile

<sup>4</sup> Facultad de Ciencias, Universidad Católica de la Santísima Concepción, Concepción, Chile

\* Correspondence: gusdiaz@udec.cl

**Citation:** Díaz, G.; Górski, K.; Manosalva, A.; Toledo, B.; Habit, E. Fragmentation Level Drives Local Fish Assemblage Diversity Patterns in Fragmented River Basins. *Diversity* **2023**, *15*, 352. <https://doi.org/10.3390/d15030352>

Academic Editors: Adam Petrusek and Michael Wink

Received: 30 December 2022

Revised: 20 February 2023

Accepted: 20 February 2023

Published: 1 March 2023

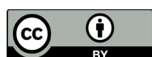

**Copyright:** © 2023 by the authors. Licensee MDPI, Basel, Switzerland. This article is an open access article distributed under the terms and conditions of the Creative Commons Attribution (CC BY) license (<https://creativecommons.org/licenses/by/4.0/>).

**Table S1.** (Supplementary material 1). List of native and non-native fish species present in the study area. X denotes the presence of the species in the basins.

| Species/Basin                                                        | Aconcagua | Maipo | Rapel | Mataquito | Maule | Itata | Bío Bío | Imperial |
|----------------------------------------------------------------------|-----------|-------|-------|-----------|-------|-------|---------|----------|
| <i>Geotria australis</i><br>(Gray 1851)                              |           |       |       |           |       | x     |         | x        |
| <i>Cheirodon pisciculus</i><br>(Girard 1855)                         | x         |       | x     | x         |       |       |         |          |
| <i>Cheirodon galusdae</i><br>(Eigenmann 1928)                        |           |       | x     |           | x     | x     | x       | x        |
| <i>Nematogenys inermis</i><br>(Guichenot 1848)                       |           |       |       |           | x     |       |         | x        |
| <i>Bullockia maldonadoi</i><br>(Eigenmann 1928)                      |           |       |       |           |       | x     | x       | x        |
| <i>Trichomycterus areolatus</i><br>(Valenciennes 1840)               | x         | x     | x     | x         | x     | x     | x       | x        |
| <i>Diplomystes nahuelbutaensis</i><br>(Arratia 1987)                 |           |       |       |           |       |       | x       |          |
| <i>Diplomystes incognitus</i><br>(Arratia & Quezada-Romegialli 2017) |           |       |       | x         | x     | x     |         |          |
| <i>Galaxias maculatus</i><br>(Jenyns 1842)                           |           |       |       |           |       | x     | x       | x        |
| <i>Basilichthys microlepidotus</i><br>(Jenyns 1841)                  |           |       | x     |           | x     | x     | x       | x        |
| <i>Odontesthes mauleanum</i><br>(Steindachner 1896)                  |           |       | x     |           |       |       | x       |          |
| <i>Percichthys trucha</i><br>(Valenciennes 1833)                     |           |       | x     | x         | x     | x     | x       | x        |
| <i>Percilia irwini</i><br>(Eigenmann 1928)                           |           |       |       |           |       |       | x       |          |
| <i>Percilia gillissi</i><br>(Girard 1855)                            |           |       | x     | x         | x     | x     |         | x        |
| Number of native especies                                            | 2         | 1     | 7     | 5         | 7     | 9     | 9       | 9        |
| <i>Cyprinus carpio</i><br>(Linnaeus)                                 | x         |       | x     |           |       |       | x       |          |
| <i>Carassius auratus</i><br>(Linnaeus)                               |           |       |       | x         |       |       | x       |          |
| <i>Tinca tinca</i><br>(Linnaeus)                                     |           |       |       | x         |       |       |         |          |
| <i>Cheirodon interruptus</i><br>(Jenyns)                             | x         |       | x     | x         |       |       |         |          |

|                                               |   |   |    |    |    |    |    |    |
|-----------------------------------------------|---|---|----|----|----|----|----|----|
| <i>Salmo trutta</i><br>(Linnaeus)             | x | x | x  | x  | x  | x  | x  | x  |
| <i>Oncorhynchus mykiss</i><br>(Walbaum)       |   | x | x  | x  | x  | x  | x  | x  |
| <i>Gambusia holbrooki</i><br>(Girard)         | x |   | x  | x  | x  | x  | x  |    |
| <i>Cnesterodon decemmaculatus</i><br>(Jenyns) | x |   | x  |    |    |    |    |    |
| <i>Australoheros facetus</i><br>(Jenyns)      | x |   | x  |    |    |    |    |    |
| Number of non-native species                  | 6 | 2 | 7  | 6  | 3  | 3  | 5  | 2  |
| Total                                         | 8 | 3 | 14 | 11 | 10 | 12 | 14 | 11 |

**Table S2.** (Supplementary material 2). Transformed average abundances of non-native species present in the eight basins studied according to level of fragmentation. Species with significant differences in average abundances are indicated with an asterisk (\*)

| Habitat | Species                           | Average abundance in low-fragmented basins | Average abundance in high-fragmented basins |
|---------|-----------------------------------|--------------------------------------------|---------------------------------------------|
| Pools   | <i>Gambusia holbrooki</i>         | 1.587                                      | 0.925                                       |
|         | <i>Oncorhynchus mykiss</i>        | 1.306                                      | 1.370                                       |
|         | <i>Salmo trutta</i>               | 0.537                                      | 0.428                                       |
|         | <i>Cheirodon interruptus</i> *    | 0.330                                      | 0.651                                       |
|         | <i>Cyprinus carpio</i>            | 0.627                                      | 0.142                                       |
|         | <i>Tinca tinca</i>                | 0.000                                      | 0.534                                       |
|         | <i>Cnesterodon decemmaculatus</i> | 0.840                                      | 0.000                                       |
|         | <i>Australoheros facetus</i>      | 0.261                                      | 0.000                                       |
|         | <i>Carassius auratus</i>          | 0.040                                      | 0.000                                       |
